# Supplementary material
Source: PubMed Central journal article supplement (PMC8992842)
Supplement: Supp_Table1.pdf [file Supp_Table1.pdf]

SUPPLEMENTARY TABLE S1. RELATIVE FREQUENCY WITH WHICH THEMES WERE MENTIONED IN DISCUSSION GROUPS

| <i>Code</i> | <i>Name</i>                                       | <i>UK1</i> | <i>UK2</i> | <i>UK3</i> | <i>UK4</i> | <i>Australia</i> | <i>Singapore 1</i> | <i>Singapore 2</i> | <i>Singapore 3</i> | <i>Argentina</i> |
|-------------|---------------------------------------------------|------------|------------|------------|------------|------------------|--------------------|--------------------|--------------------|------------------|
| 1           | Others' knowledge about autism                    | ++         | +          | ++         | ++         | ++               | +                  | ++                 | ++                 | ++               |
| 2           | External support and services—access and barriers | ++         | ++         | ++         | +          | +                | ++                 | +                  | +                  | -                |
| 3           | Loss of resources                                 | -          | +          | +          | +          | -                | -                  | +                  | -                  | -                |
| 4           | Family support                                    | +          | +          | +          | ++         | -                | -                  | +                  | +                  | +                |
| 5           | Sensory issues                                    | +          | +          | -          | +          | -                | -                  | +                  | +                  | +                |
| 6           | Characteristics of autism                         | +          | ++         | ++         | +          | +                | ++                 | +                  | +                  | ++               |
| 7           | “Autistic” identity                               | +          | ++         | +          | -          | ++               | ++                 | ++                 | ++                 | -                |
| 8           | Self-determination, autonomy                      | ++         | +          | ++         | ++         | +                | +                  | ++                 | ++                 | ++               |
| 9           | Mental health issues                              | +          | +          | +          | +          | +                | -                  | +                  | +                  | +                |
| 10          | The nature of friendship                          | +          | +          | +          | +          | +                | +                  | +                  | +                  | +                |
| 11          | Social engagement                                 | ++         | ++         | +          | +          | ++               | ++                 | +                  | +                  | +                |

++, theme frequently mentioned/discussed for that group (i.e., within top four most frequently mentioned themes in that group); +, theme mentioned in that group; -, theme not mentioned in that group.
