# Supplementary material
Source: PubMed Central journal article supplement (PMC8992842)

# Supplementary Data

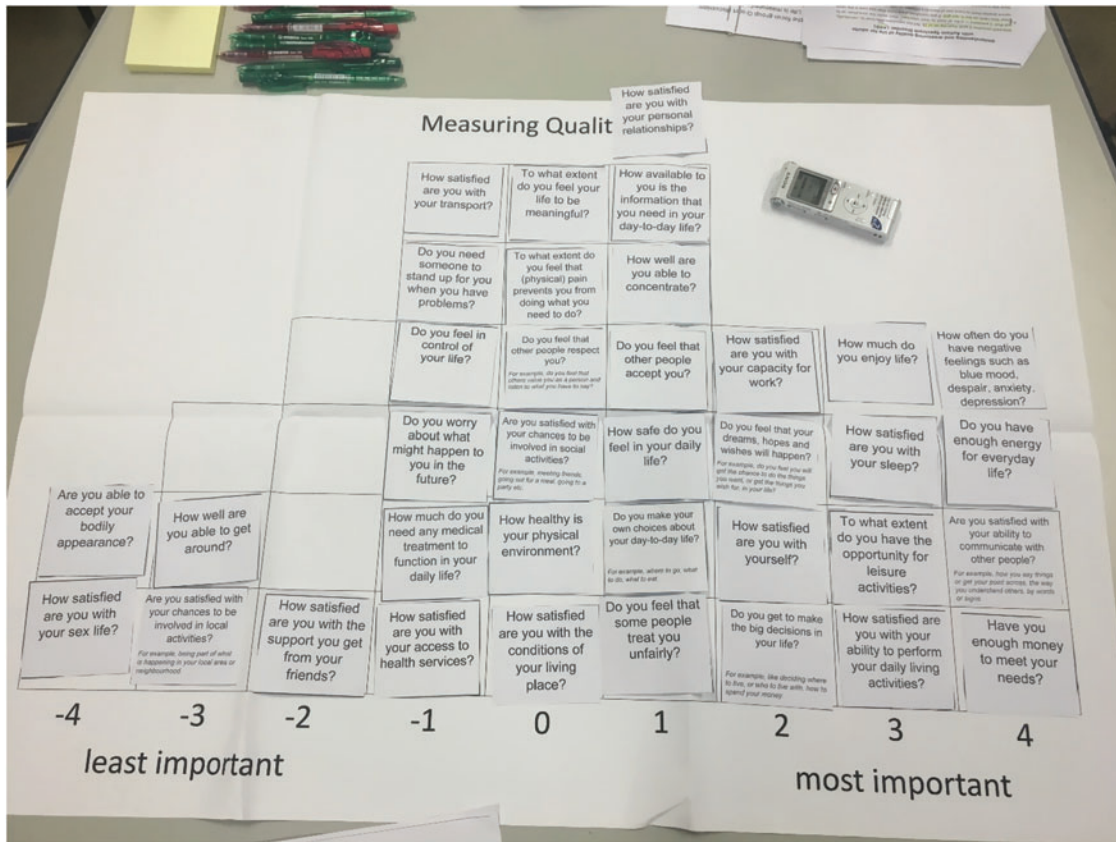

**SUPPLEMENTARY FIG. S1.** Example of Q sort grid.

Supplement: Supp_Fig1.pdf [file Supp_Fig1.pdf]
